# Supplementary material for: TNF-αand IFN-s-Dependent Muscle Decay Is Linked to NF-κB- and STAT-1α-StimulatedAtrogin1andMuRF1Genes in C2C12 Myotubes
Source: Hindawi journal article supplement (doi:10.1155/2013/171437), 2013-01-01

### A. MTT

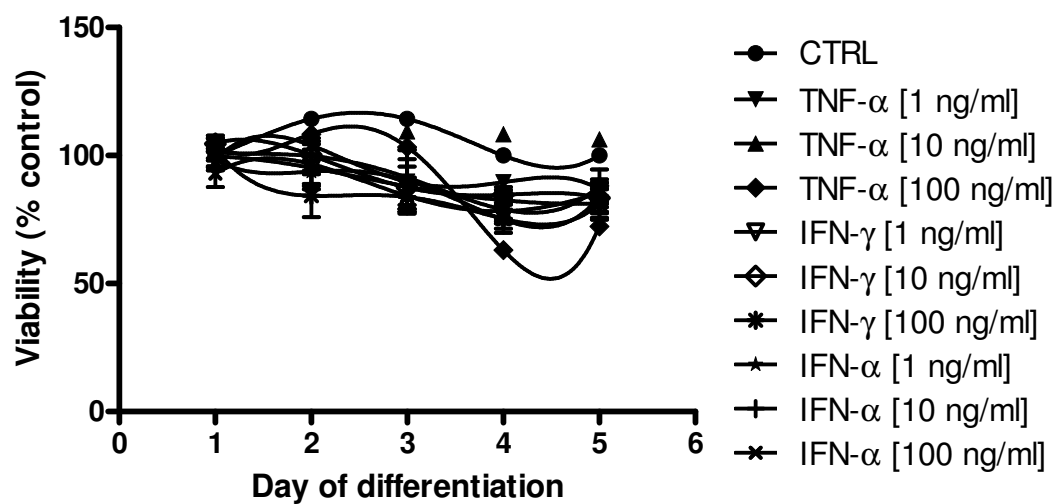

### B. MTT

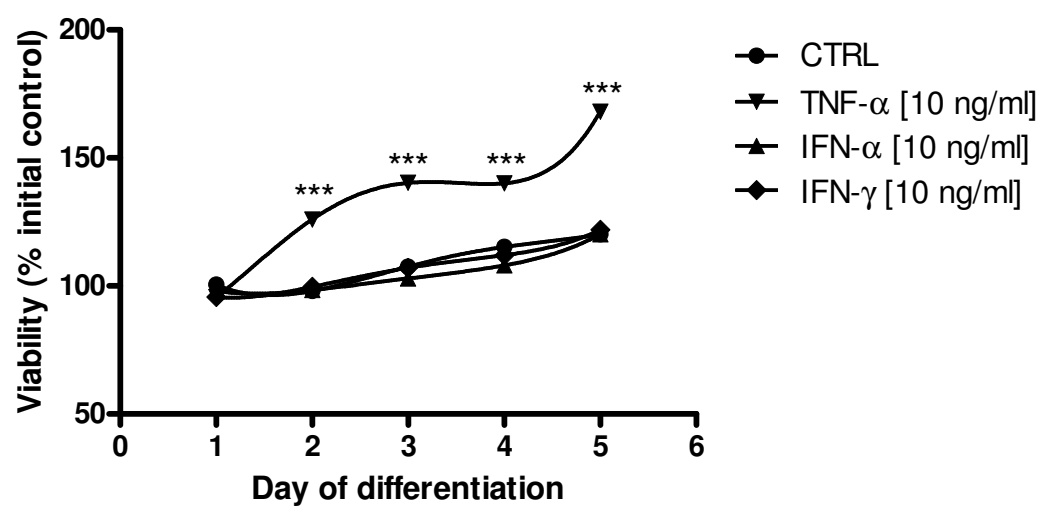

### C. MTT

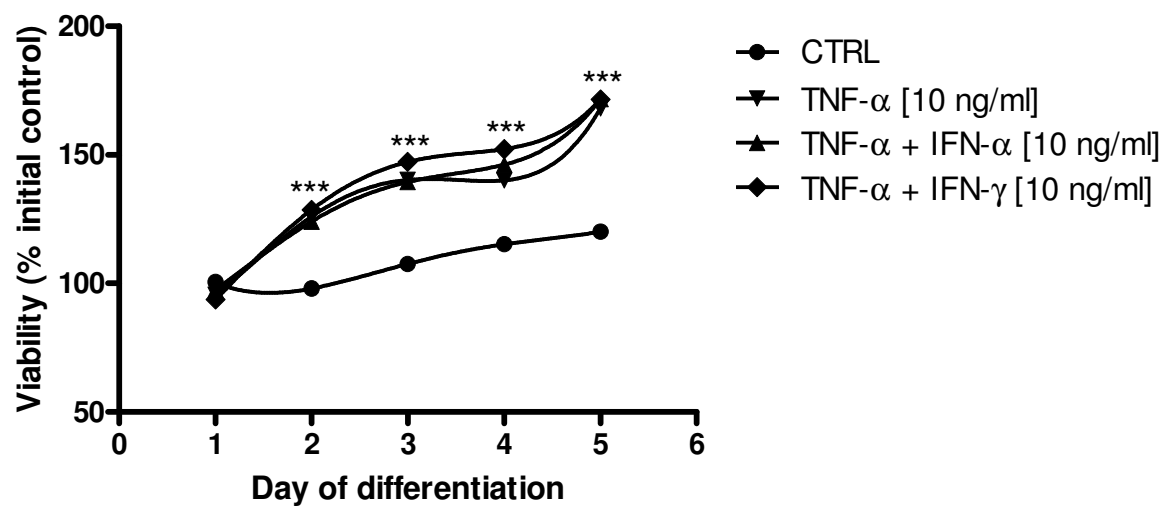

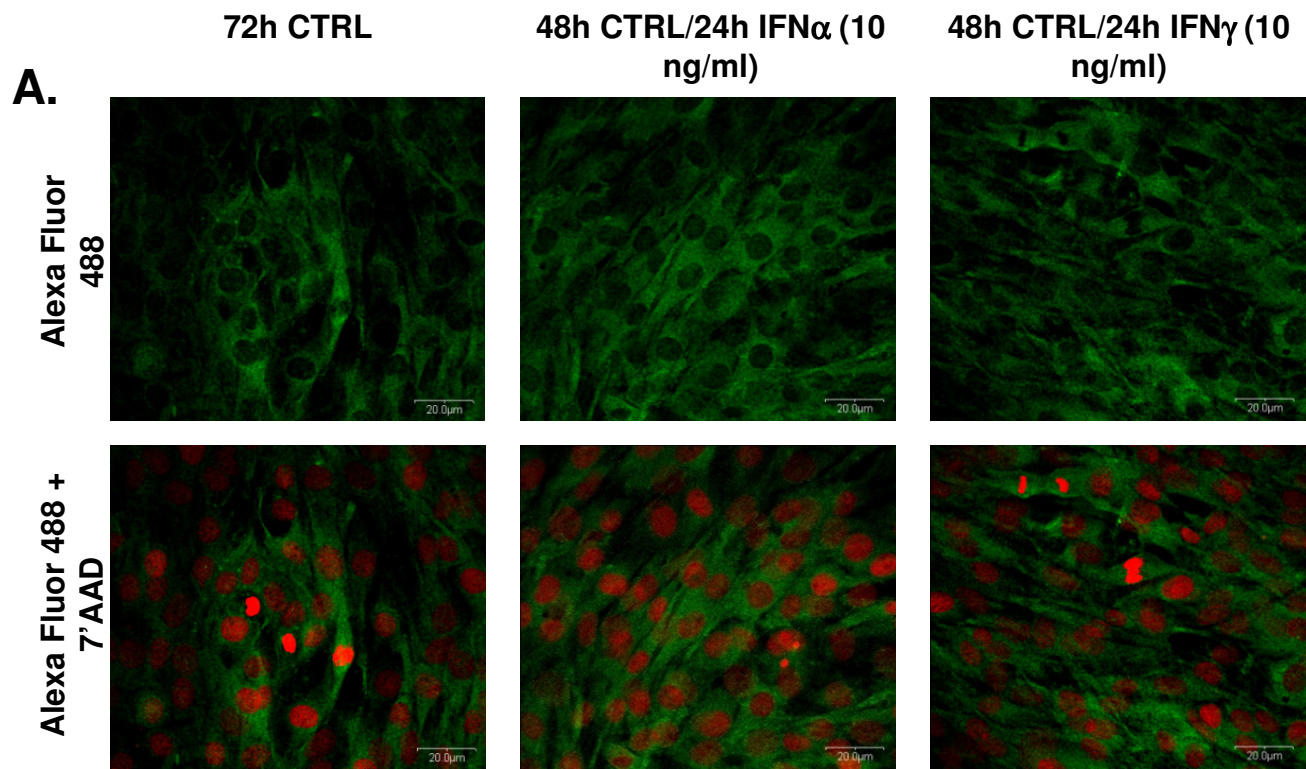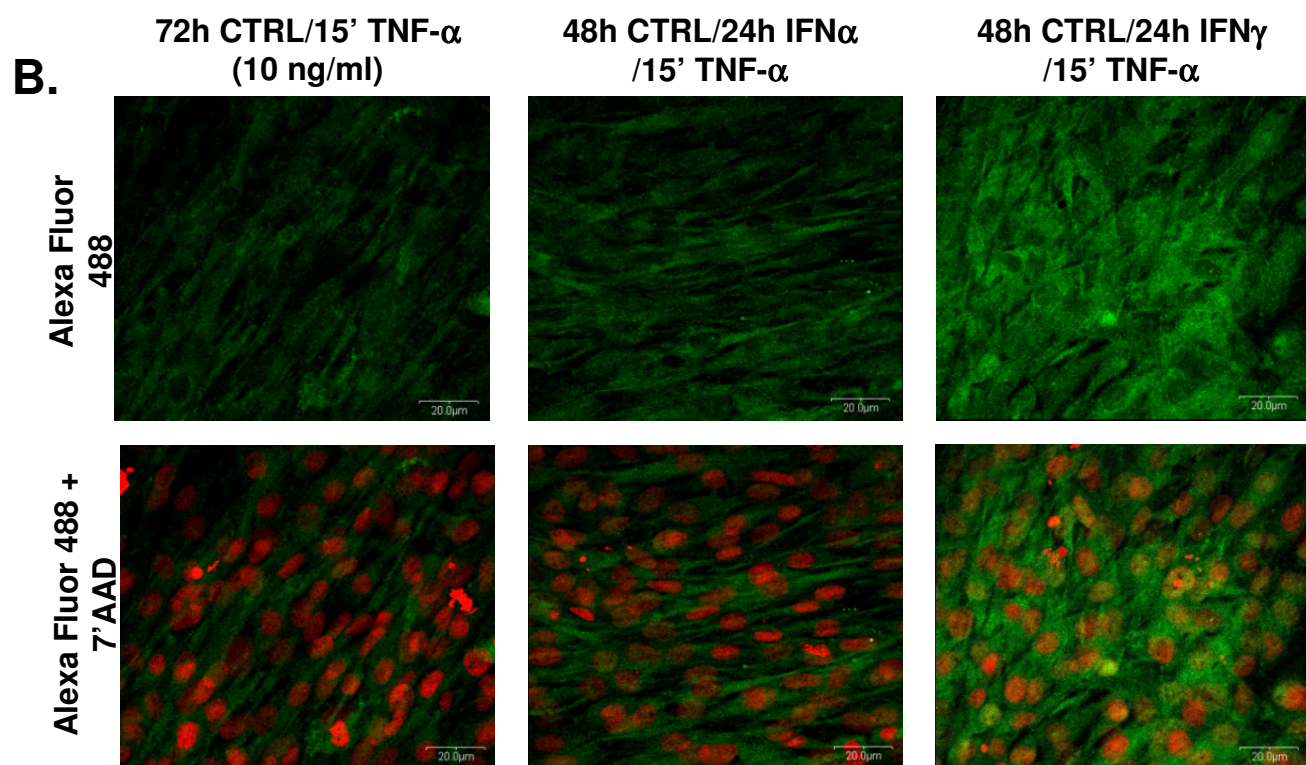



**C.**

72h CTRL/30' TNF- $\alpha$

48h CTRL/24h IFN $\alpha$   
/30' TNF- $\alpha$

48h CTRL/24h IFN $\gamma$   
/30' TNF- $\alpha$

Alexa Fluor  
488

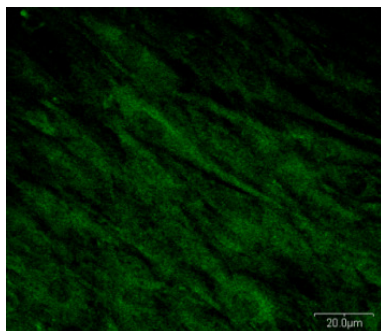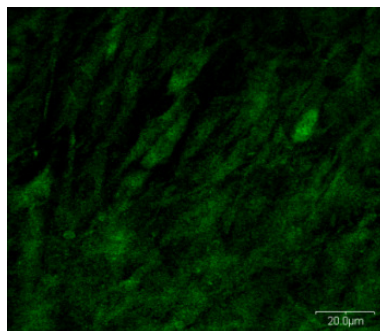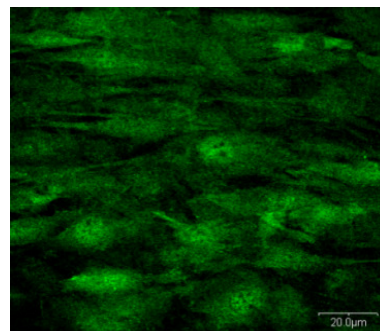

Alexa Fluor 488 +  
7'AAD

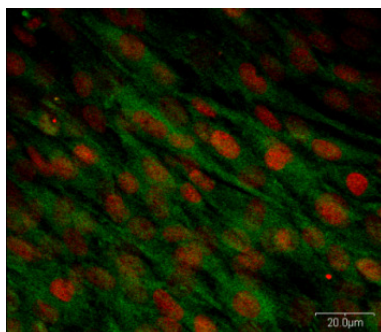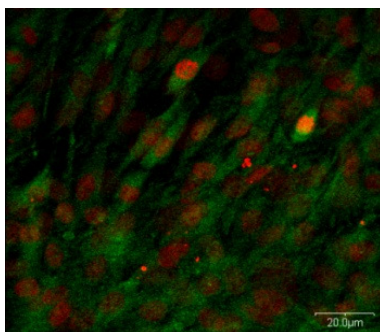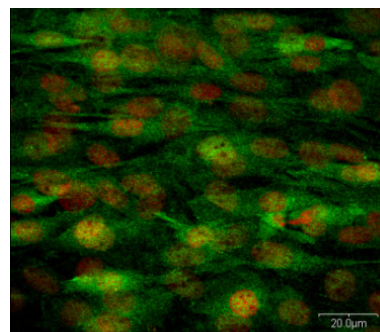

**D.**

72h CTRL/60' TNF- $\alpha$

48h CTRL/24h IFN $\alpha$   
/60' TNF- $\alpha$

48h CTRL/24h IFN $\gamma$   
/60' TNF- $\alpha$

Alexa Fluor  
488

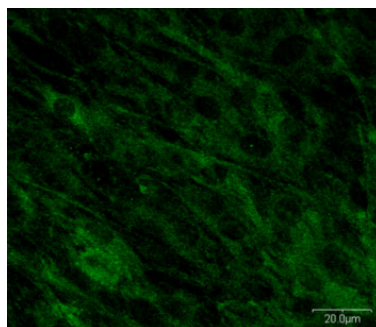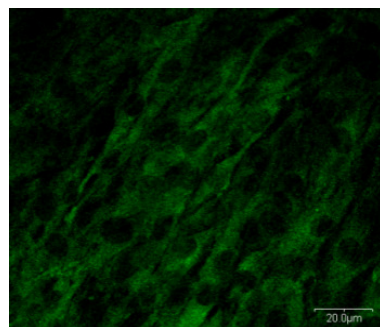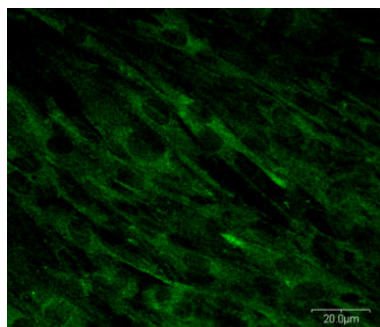

Alexa Fluor 488 +  
7'AAD

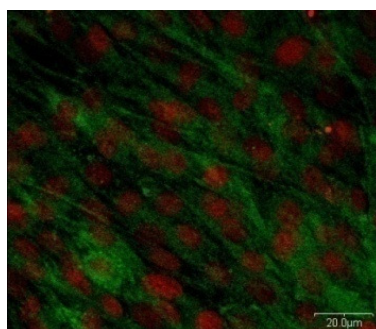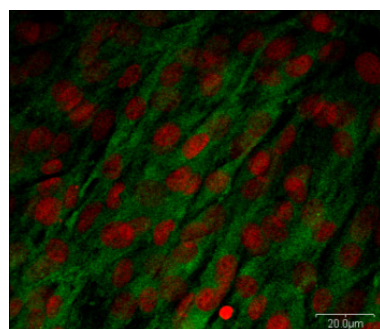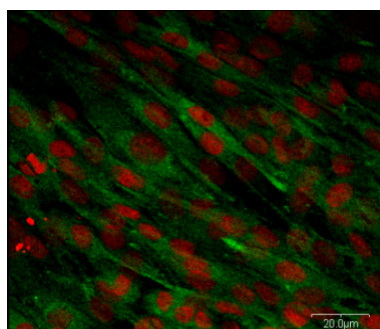

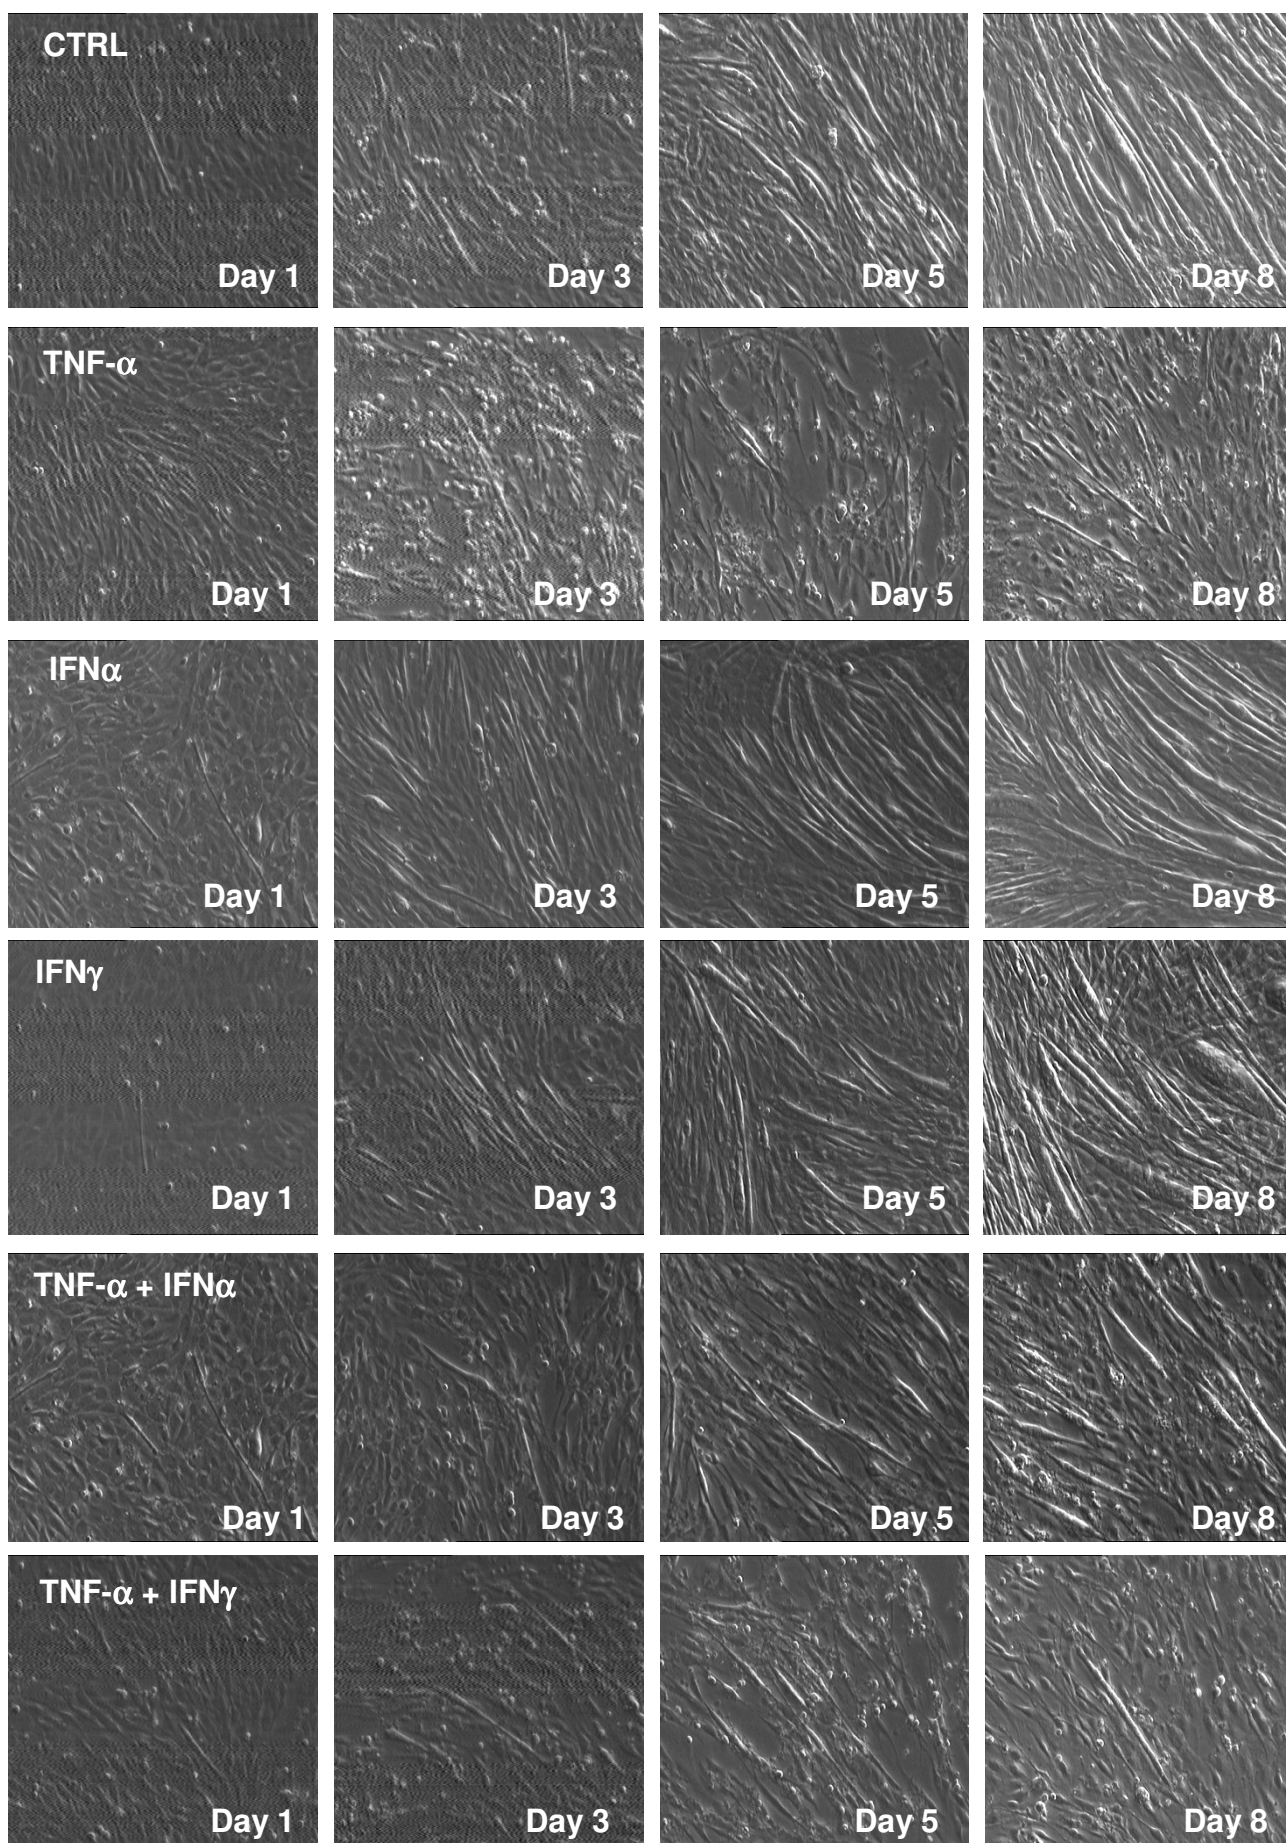

Supplement: f3 [file 171437.f3.pdf]
