# Supplementary material for: TNF-αand IFN-s-Dependent Muscle Decay Is Linked to NF-κB- and STAT-1α-StimulatedAtrogin1andMuRF1Genes in C2C12 Myotubes
Source: Hindawi journal article supplement (doi:10.1155/2013/171437), 2013-01-01

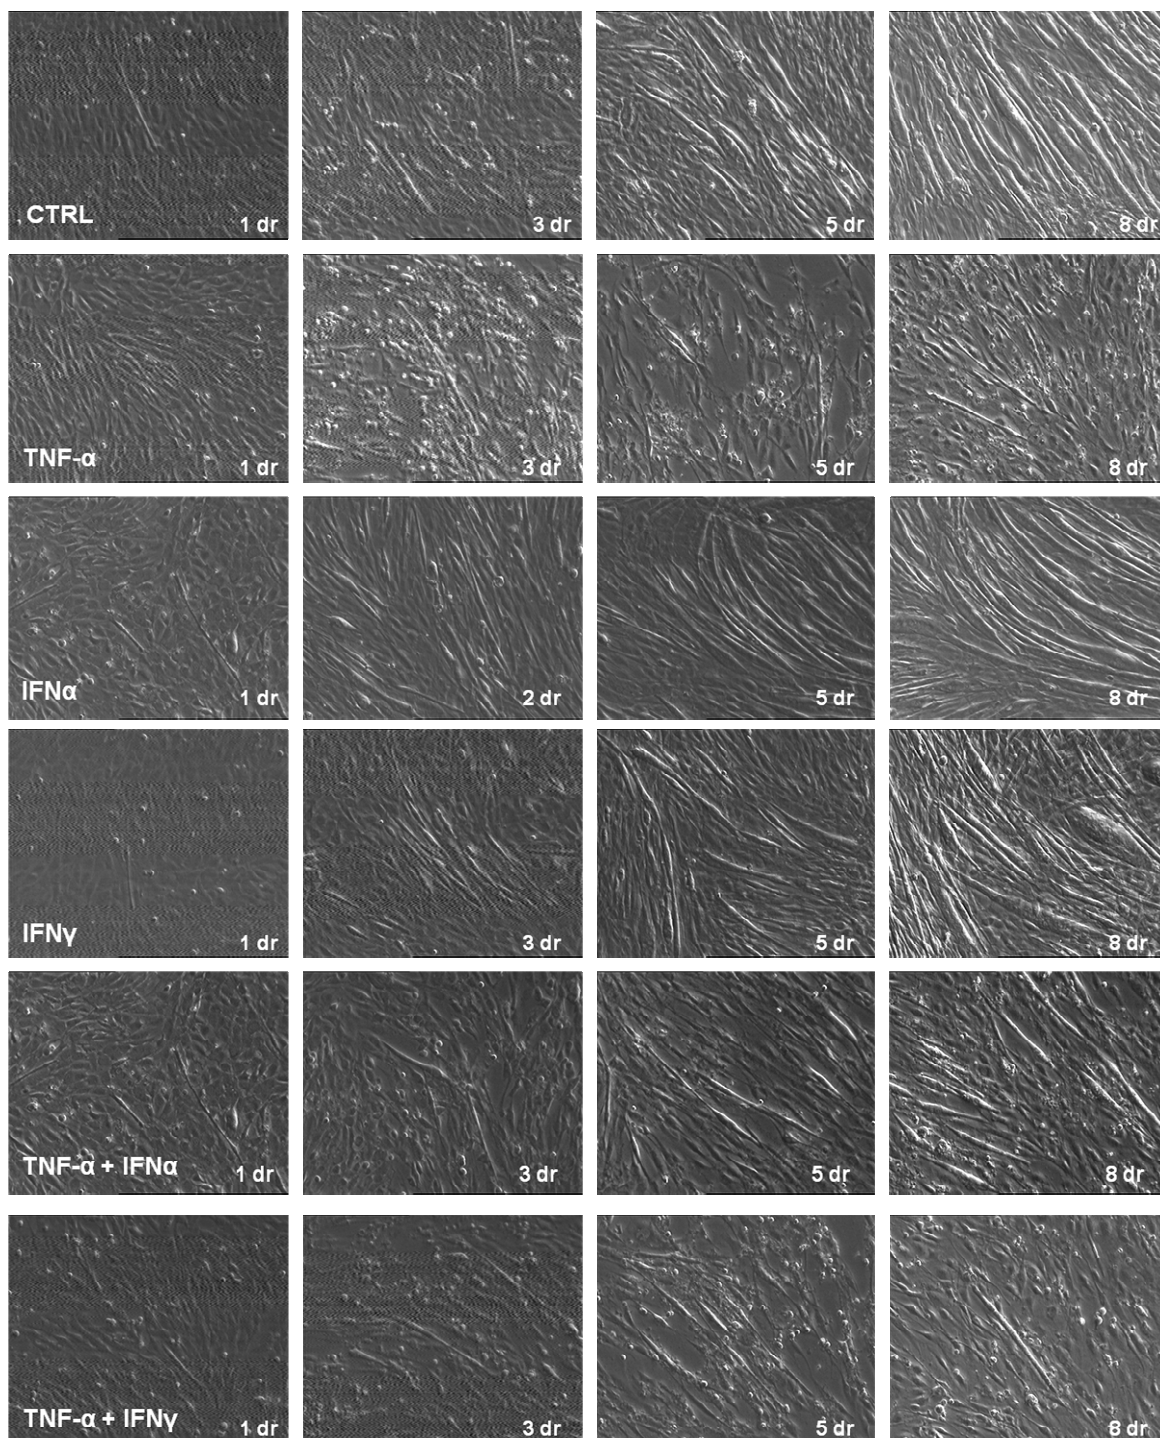

Supplement: f2 [file 171437.f2.pdf]
